# Supplementary material for: Quantifying carbon benefits from protecting and restoring tropical forests and agro-forestry landscapes in Vanuatu
Source: Research Square preprint supplement (doi:10.21203/rs.3.rs-7680245/v1), 2025-10-23
Supplement: Supplementary file 1 [file ca41bb619a72c9c68e4822b4.docx]

**Supplementary Materials 1**: Landuse and landcover change emissions factors (EF) used to calculate carbon benefits for *Forest* *Protection,* *Improved Forest Management*, *Forest Restoration* interventions. EF are calculated as the difference between carbon stocks of the baseline and with project scenario (where reported). AGB = above ground biomass, BGB = below ground biomass. Note AGB is inclusive of coarse woody debris (DDWD). All units are in Mg C ha-1.

| **Carbon pool** | **Baseline scenario landuse/land cover** | **‘With project scenario’ change in landuse/landcover** | **EF** |
| --- | --- | --- | --- |
| ***Forest Protection*: 1 (a). Mature tropical rainforest (*logging* and *gardens*), Whitegrass** | | | |
| /Land-use change | Mature forest## (average) | Mature forest## | EF |
| AGB | 419.1 |  | 419.9 |
| BGB | 86.4 | N/A | N/A |
| Total biomass | 505.4 |  | 419.1 |
| ***Forest Protection*: 1 (b). Mature and secondary tropical rainforest (*quarry*), Whitegrass** | | | |
| Carbon pool/Land-use change | EF, Mature forest### | | |
| AGB | 243 | | |
| BGB | 50.8 | | |
| Total biomass | 293.7 | | |
| Soil organic carbon | 63.2 | | |
| Total carbon stock | 356.9 | | |
| ***Improved Forest Management*: 2. (a) Fallow gardens converted to shade coffee, Whitegrass** | | | |
| Carbon pool/Land-use change | Grassland** | Mature forest (coffee grown under shade)^ | EF |
| AGB | 6.2 | 164.8 | 158.6 |
| BGB | 1.5 | 25.4 | 23.9 |
| Total biomass | 7.7 | 190.2 | 182.5 |
| ***Forest Restoration*: 2. (b) Fallow gardens converted to native forest, Whitegrass** | | | |
| Carbon pool/Land-use change | Grassland (sparse tree coverage) | Open forest# | EF |
| AGB | 6.2 | 407.1 | 400.9 |
| BGB | 1.5 | 83.5 | 82 |
| Total biomass | 7.7 | 490.6 | 482.9 |
| ***Improved Forest Management*: 3. Cattle grazing/coconut plantation area (enhancement by planting supplementary shade, fruit, timber and/or nut producing trees, Whitegrass** | | | |
| Carbon pool/Land-use change | Existing coconut plantation | Moderately dense forest | EF |
| AGB | 35.9 | 71.8 | 35.9 |
| BGB | 7.2 | 14.3 | 7.2 |
| Total biomass | 43.1 | 86.2 | 43.1 |
| ***Forest Restoration*: 4. Reforestation of Imanaka Creek riparian margins, Middlebush** | | | |
| Carbon pool/Land-use change | Middlebush carbon stocks | Mature forest^ | EF |
| AGB | 82.8 | 407.1 | 324.3 |
| BGB | 23.8 | 83.5 | 59.7 |
| Total biomass | 106.6 | 490.6 | 384.0 |
| ***Improved Forest Management*: 5. Agroforestry zone, South River** | | | |
| Carbon pool/Land-use change | Degraded coastal forest | Kauri Reserve/Agroforestry area | EF |
| AGB | 110.3 | 415.6 | 305.3 |
| BGB | 17.9 | 90.2 | 72.3 |
| Total biomass | 128.2 | 505.8 | 377.7 |
| ***Forest Restoration*: 6. (a) Forest enhancement zone (*fallow gardens*), South River** | | | |
| Carbon pool/Land-use change | Enhancement area current carbon stocks | Kauri Reserve/Agroforestry area | EF |
| AGB | 6.2 | 415.6 | 409.4 |
| BGB | 1.5 | 90.2 | 88.7 |
| Total biomass | 7.7 | 505.8 | 498.1 |
| ***Forest Restoration*: 6. (b) Forest enhancement zone (*degraded forest*), South River** | | | |
| Carbon pool/Land-use change | Enhancement area current carbon stocks | Kauri Reserve/Agroforestry area | EF |
| AGB | 110.3 | 415.6 | 305.3 |
| BGB | 17.9 | 90.2 | 72.3 |
| Total biomass | 128.2 | 505.8 | 377.7 |
| ***Forest Restoration*:** **7. Reforestation of riparian margins, South River** | | | |
| Carbon pool/Land-use change | Existing carbon stock of trees** | Mature forest^^ | EF |
| AGB | 26.6 | 415.6 | 389 |
| BGB | 6.2 | 90.2 | 84 |
| Total biomass | 32.8 | 505.8 | 473 |

**Notes**:

1 (a). Carbon stocks used to calculate avoided deforestation emission reductions for #1 (a) are based on the average AGB of (a) plots 1-18 at Whitegrass, and (b) the logged section of forest at Whitegrass. While logged trees were generally much larger (average DCH 80.5 ± 9.1 cm) than trees found within plots 1-18 at Whitegrass (average DBH 20.3 ± 4.4 cm), we conservatively use a lower EF to ensure values are not unintentionally disingenuously skewered by extrapolating the much higher biomass estimated for trees selectively cut along the logging track across the whole CCA, which reflects a more robust estimate of likely biomass loss in the baseline scenario. Belowground biomass loss is conservatively excluded from calculations given this carbon pool remains intact and will slowly decompose overtime.

1 (b). Carbon stocks of mature forest are conservatively calculated based on the *median* carbon stock from plots 1-18 at Whitegrass given that forest areas subject to potential loss from quarry activities are not likely to exhibit the larger trees targeted for logging, which drive *average* biomass upwards. Carbon stocks in the buffer zone around the Mount Tangen quarry are also more variable given differences in land use and land cover. Higher biomass, mature tropical forest surrounds the western, southwestern, and eastern flanks, with another area of forest located to the north bordering Ipak Creek within the 100m buffer zone. Low biomass grasslands/wild cane are located on the summit of Mount Tangen to the south and east, and medium biomass, low tree density coconut plantations and grazing lands border the northwest footprint. Large trees within the CCA (*Forest Protection*) and mature coconut trees (Cattle grazing/coconut plantation area), which are particularly susceptible to windthrow, are most likely to be degraded as a result of edge effects and wind throw. Soil carbon in the top 30cm of topsoil is calculated at 63.2 Mg C ha-1 (average value for Tanna, Global Forest Watch 2000), with windthrow likely to directly impact soils as trees are uprooted and soils exposed to oxidation and lateral erosion.

2 (a). Net carbon benefits from conversion of grasslands to shade coffee are calculated based on the average carbon stocks in mature forest recorded from an existing ~1,200m2 plantation of shade coffee at Whitegrass, where coffee was the predominant understory species. Grassland carbon stocks are referenced from the Vanuatu FREL (MoF 2022) and used as a proxy for existing carbon stocks in fallow gardens where tree coverage is sparse. Mature forest (coffee grown under shade) values also includes avg. CWD from Whitegrass plots 1-18 for AGB given it was not assessed during surveys.

2 (b). Approximately 4.8 ha of fallow, disused gardens within the CCA at Whitegrass will be restored back to native forest through planting predominantly in native canopy species. Carbon benefits are calculated as the difference between grasslands (MoF, 2022) and the average carbon stock of mature forest at Whitegrass (plots 1-18).

3. Carbon benefits are conservatively estimated from planting all ~24 ha in low density (~150 trees ha-1) coconut and/or fruit trees at double the current density, which ensures the retention of grasslands able to be utilized for grazing by cattle stock.

4. Carbon benefits are calculated based on the difference between existing carbon stocks recorded at Middlebush (106.6 Mg C ha-1) and the mean (490.6 Mg C ha-1) of mature forests from Whitegrass (plots 1-18).

5. Carbon benefits are calculated as the difference between the degraded forest (6. b) of the Forest Enhancement Zone (128.2 Mg C ha-1) which is used as proxy for ‘Degraded coastal forest’, and the mean carbon stocks of the Kauri Reserve and plots surrounding large, mature trees in the Agroforestry Zone (505.8 Mg C ha-1).

6. (a) and (b). Carbon benefits are calculated as (6. a) the difference between existing stocks in degraded forest (128.2 Mg C ha-1) and the average carbon stocks of the Kauri Reserve and Agroforestry area (505.8 Mg C ha-1); and (6. b) fallow gardens (7.7 Mg C ha-1) and average carbon stocks of the Kauri Reserve and Agroforestry area.

7. Carbon gains are calculated as the difference between existing carbon stocks (32.8 Mg C ha-1) and the average carbon stock of the Kauri Reserve and Agroforestry Zone assessed on Erromango (505.8 Mg C ha-1).

**Supplementary Materials 2:** Summary of estimated carbon benefits from implementing the Life and Land Project. PVC’s = Plan Vivo Certificates.

| **Project intervention** | **Area (ha)*** | **Carbon benefit (Mg CO2e per year)** | **Carbon benefit (Mg CO2e), total 30 years** | **Achievement reserve (10%)** | **Estimated PVC's total**** | **Estimated PVC's per year** |
| --- | --- | --- | --- | --- | --- | --- |
| **Restoration** | 24.9 | 667 | 19,998 | 1,999 | 17,998 | 600 |
| **Improved Management** | 38.1 | 232 | 6,960 | 696 | 6,264 | 209 |
| **Protection** | 299.7 | 5,776 | 173,279 | 17,328 | 155,951 | 5,198 |
| **Total** | **362.7** | **6,675** | **200,237** | **20,024** | **180,213** | **6,007** |

**Notes**:

*Ha for which carbon benefits are calculated per intervention (total project area is 395 ha).

**PVC's = Carbon benefit – achievement reserve.

**Supplementary Materials 3:** List of species recorded from assessment sites.

| **Scientific name** | **Bislama** | **Local language: Whitegrass and Middlebush** | **Local language: South River** |
| --- | --- | --- | --- |
| *Acacia spirorbis* |  | Namal |  |
| *Acalypha spp.* |  | Neimian |  |
| *Acanthaceae spp.* |  |  | Narifram |
| *Aceratium oppositifolium* |  | Nuanowe |  |
| *Alphitonia zizyphoides* |  | Nafa | Nampo |
| *Alsophila anitensis* | Black palm | Nuto |  |
| *Artocarpus altilis* | Breadfruit |  | Nmarr |
| *Bambusa spp.* |  | Bamboo |  |
| *Barringtonia edulis* | Cut nut | Nafel | Velga |
| *Bischofia javanica* | Nakoka | Nakuka | Nouko |
| *Burckella obovatta* |  | Neimit |  |
| *Calophyllum neoebudicum* |  |  | Pokur |
| *Canarium harveyi* |  |  | Nangai |
| *Carica papaya* |  | Pawpaw |  |
| *Caryota ophiopellis* | Snek palm | Snake palm |  |
| *Casuarina equisetifolia* |  | Nial |  |
| *Cerbera odollam* |  |  | Nesou |
| *Citrus sinensis* |  |  |  |
| *Claoxylon psilogyne* |  | Tiklipe |  |
| *Cocos nucifera* | Coconut |  |  |
| *Colocasia esculenta* |  | Taro |  |
| *Cordyline fruticosa* | Nangaria | Narwiuh |  |
| *Cryptocaria spp.* |  |  |  |
| *Cryptocaria turbinata* |  | Nikiapin | Neiampin |
| *Cupaniopsis spp.* |  |  | Nangal |
| *Cyathea cooperi* |  |  | Nevenie |
| *Dendrocnide latifolia* | Nangalate | Nouirau | Neliat |
| *Deparia acrostichoides* |  |  | Namkar wokon |
| *Didymocheton gaudichaudianus* |  |  | Nampu |
| *Dillenia biflora* |  |  | Nekul |
| *Dioscorea esculenta* |  | Yam |  |
| *Dracontomelon spp.* |  | Naul |  |
| *Dryopteris marginalis* |  | Ialkinapin |  |
| *Dysoxylum aneityense* |  |  | Nimtu |
| *Dysoxylum bijugum* | Karibu | Tuiah |  |
| *Dysoxylum gaudichaudianum* | Natuan |  |  |
| *Elattostachys falcata* | Nilaru | Nikuito |  |
| *Endospermum medullosum* |  |  | Novourompu |
| *Erythrina variegata* |  | Narala |  |
| *Fagraea ceilanica* |  | Napuas |  |
| *Ficus antenosperma* | Wild Napalango |  | Bongnoot |
| *Ficus benghalensis* |  | Nabanga |  |
| *Ficus glandifera* | Nabanga | Banyan |  |
| *Ficus obliqua* |  | Nalilu |  |
| *Ficus scabra* | Red nabalango | Nasis |  |
| *Ficus septica* |  | Libang |  |
| *Ficus spp.* |  | Nianen |  |
| *Ficus wassa* | Blak wud | Nasas |  |
| *Flindersia spp.* |  |  | Nah |
| *Garcinia pseudoguttifera* |  | Niklakei |  |
| *Garuga floribunda* |  | Nouha |  |
| *Geissois denhamii* |  |  | Nongrop |
| *Glochidion ramiflorum* | Namalao | Namilo |  |
| *Grias spp.* |  |  | Peltet |
| *Gymnanthes lucida* |  |  | Neial tovu |
| *Hedycarya dorstenioides* | Nanimi | Nikapuap |  |
| *Heliconia spp.* |  | Nupalip |  |
| *Hernandia moerenhoutiana* |  |  | Neyely |
| *Hibiscus tiliaceus* | Burao/Purau | Nuwo | Urenvau/Orenvau |
| *Homalanthus nutans* |  | Nouyalen |  |
| *Homolanthus ebracteatus* | Nawiahalang |  |  |
| *Hopea spp.* |  |  | Mompol |
| *Inocarpus fagifer* |  | Nauk |  |
| *Intsia bijuga* |  |  | Neiamtau |
| *Ipomoea indica* |  | Rop blo laplap |  |
| *Kleinhovia hospita* |  | Namital |  |
| *Lablab purpureus* |  | Leaf blo laplap |  |
| *Leucosyke australis* |  | Nahou |  |
| *Licuala spp.* |  |  | Luvorr |
| *Macaranga dioica* |  |  | Novou |
| *Macaranga spp.* | Wael navenu | Naula |  |
| *Macropîper latifolium* | Wael kava | Nokiam |  |
| *Mangifera idica* | Mango |  |  |
| *Melicope latifolia* | Wud blong toka | Kaulaul |  |
| *Melicope lunu-ankenda* |  |  | Netnang |
| *Melicope roxburghiana* |  |  | Nitnang meliang |
| *Meryta neoebudica* |  | Kalulua |  |
| *Metroxylon warburgii* | Natangura | Kitbakira |  |
| *Morinda citrifolia* | Noni | Nawias |  |
| *Musa spp.* |  | Banana |  |
| *Myristica fatua* | Nandai |  | Nande |
| *Myristica inutilis* | Nandai | Nitaan |  |
| *Myristica spp.* |  | Namiahul |  |
| *Nasturtium officinale* |  | Watercress |  |
| *Neonauclea forsteri* | Nabalango | Kakilapsapis |  |
| *Ochrosia elliptica* |  | Kawiat Taut |  |
| *Palaquium neoebudicum* |  |  | Nemorietu |
| *Pandanus amaryllifolius* |  |  | Nariviu |
| *Pandanus tectorius* | Pandanus | Nimankiu |  |
| *Persea americana* | Avocado | Butter tree |  |
| *Phyllanthus ciccoides* | Nadame | Naswaiuh |  |
| *Piper methysticum* |  | Kava |  |
| *Piper nigrum* |  | Tulaimian |  |
| *Pipturus argenteus* |  |  | Nandomai |
| *Pisonia umbelifera* | Stinkwud | Napkapik, Nuanapam |  |
| *Podocarpus neriifolius* |  |  | Nimsal |
| *Polyscias scutellaria* |  | Nalpalip |  |
| *Pometia pinnata* | Nantau |  | Tau |
| *Pouteria sp* |  | Ningat, Nisap |  |
| *Pterocarpus indicus* | Blue water |  | Fongfati |
| *Schefflera neoebudica* |  | Nalulu |  |
| *Semecarpus vitiensis* |  | Nilah | Noule/Naulee |
| *Sterculia banksiana* |  | Nukunapahum |  |
| *Sterculia vitiensis* | Tropical chestnut |  | Wowo |
| *Symplocos spp.* |  |  | Molis |
| *Syzygium clusiifolium* |  |  | Neialam |
| *Syzygium malaccense* |  | Nikawik |  |
| *Syzygium spp.* |  | Nikpat, Naun | Neimonu |
| *Tabernaemontana spp.* |  | Nasireih |  |
| *Terminalia sepicana* |  | Tahlkit, Natuvoa |  |
| *Trema cannabina* |  | Niting |  |
| *Trichilia rubescens* |  |  | Natmolep |
| *Vitex spp.* |  |  | Nangaisompoli |
| Unknown |  | Napil |  |
| Unknown |  | Kaukom |  |
| Unknown |  | Naieuymit |  |
| Unknown |  | Napik |  |
| Unknown |  | Nekatul |  |
| Unknown |  | Niparipa |  |
| Unknown |  | Nuiyatu |  |
| Unknown |  | Nulaualua |  |
| Unknown |  | Talkit |  |
| Unknown |  | Tipaosili |  |
| Unknown | Wild nasasa |  |  |
| Unknown |  |  | Moash |
| Unknown |  |  | Neiuri |
| Unknown |  |  | Nettor |
| Unknown |  |  | Tovul |
| Unknown |  |  | Sompui |
| Unknown |  |  | Nompior |
| Unknown |  |  | Neiavia |
| Unknown |  |  | Moss |
| Unknown |  |  | Nempe |
| Unknown |  |  | Niapul |
| Unknown | Fern |  | Nonatma |
| Unknown |  |  | Niavul |
| Unknown | Liana |  | Nosondomai |
| Unknown | Liana |  | Novosvikae |
| Unknown |  |  | Nentrap |
| Unknown |  |  | Neilwavi |

**Supplementary Materials 4**: Community by-laws designed to avoid deforestation and forest degradation.

The following are community bylaws for each of the project sites within the *Life & Land Project*. These bylaws are designed to help with governance and on-going management (post-project funding) to ensure the ‘permanence’ of carbon sequestered.

**Whitegrass bylaws**

General Bylaws

1. Replant trees that have been damaged by wind, rain, or animals. For every seedling lost, replant five more.
2. Maintain and care for the planted trees, and carry out regular maintenance to prevent trees being smothered by vines.
3. People may collect fruits, wild vines, or fallen wood for firewood, but must not damage live trees.
4. Cutting of planted trees is not allowed, unless removing a few to help other trees grow better.
5. The chief and committee may issue fines if someone breaks these rules.

Core Community Conservation Area (CCA)

1. Cutting of trees, timber, or vines is not allowed in the CCA (unless vines are invasive species, and/or they are smothering trees).
2. Hunting, lighting fires, and grazing cattle is not allowed in the CCA.
3. People may collect non-timber resources from the area (e.g. fruit, nuts), but must not damage live trees.
4. Only dead or fallen wood may be collected, with care taken not to damage live trees.
5. No new garden creation is permitted.
6. Existing gardens in the core CCA are to be cleared of invasive vines and replanted in native and/or agroforestry (e.g. fruit and nut) trees, with regular maintenance carried out to ensure survival.

Gardens outside the core Community Conservation Area

1. Gardens must be made primarily in open areas e.g. areas already cleared and used for gardens in the past outside the core CCA.
2. For shifting agriculture/garden creation where bush needs to be cleared, large trees (over 15cm DBH) must not be cut (undergrowth can be cleared).
3. No gardens are allowed within 10 metres of any water source.

Timber

1. Timber trees must be mature before being harvested.
2. Timber may only be harvested from designated plantation areas.
3. For every tree harvested, five must be replanted.
4. Only 10% of plantation trees may be harvested each year (1 in 10 trees).

Coffee

1. Do not cut trees thicker than 15cm DBH to plant coffee.

**Middlebush bylaws**

1. Do not cut existing/planted trees inside the project site (unless required to enhance forest growth e.g. assist with natural thinning/productivity).
2. Hunting of birds or any other animals is not allowed (apart from invasive species).
3. Livestock such as cattle or horses are not allowed inside the project site.
4. Do not light fires within the project area.
5. People are allowed to collect medicinal leaves, vines, seeds, seedlings, fruit, and nuts—but they must first ask the plot owner. When collecting, they must not damage any growing plants.
6. Harvesting of naturally fallen trees and/or tree branches for firewood is permitted provided damage to surviving/standing trees is minimal.
7. People are allowed to cut vines and/or remove invasive species, including animals or plants that are damaging the trees that were planted.
8. Do not trespass on someone else’s plot.
9. The plot must be kept clean and planted trees kept free from overgrowth—vines should not be tangled around the plants.
10. If a plant dies, the plot owner must replant five seedlings.
11. If someone wants to cut timber or firewood trees, they must plant them outside of the conservation/tabu area (no trees for timber/firewood trees should be planted in the conservation/tabu area).
12. Gardens restored to forest within the conservation/tabu area are not to be made back into gardens

**South River bylaws**

General bylaws

1. Hunting or killing of birds, coconut crabs, or flying foxes is not allowed.
2. Lighting fires or burning wood in project areas is not allowed.
3. Cutting of planted trees is not allowed.
4. Fruit or fallen wood may be collected, but live trees must not be damaged.
5. Trees that are damaged by cyclones, fire, or animals, or that are dead, must be replanted.

Forest Enhancement Area

Goal: Restore and protect degraded forest to ensure its health and carbon storage.

1. Gardening is not allowed in the forest enhancement area.
2. Cutting timber or firewood is not allowed.
3. If a tree dies, five must be replanted.
4. Open spaces must have native trees planted in them.
5. Livestock is not allowed in this area.
6. No development is allowed that will destroy forest trees.
7. Invasive animals (e.g. pigs, rats) and invasive plants may be removed.
8. Cutting a tree is only allowed if it supports the healthy growth of another.

Agroforestry

Goal: Provide a sustainable source of timber and food without clearing intact forest.

1. Timber must be planted in open spaces first.
2. If clearance is needed, only small trees under 10cm DBH may be cut.
3. Timber may not be harvested until mature and full-sized.
4. Only 10% of mature timber may be harvested each year, and for each tree cut, five must be replanted.

Riparian Area

Goal: Prevent erosion and establish fruit/nut trees along riverbanks.

1. Cattle must be kept at least 10 metres from the river, and fences must be maintained.
2. Cutting of trees or wood in riparian areas is not allowed.
3. Garden clearing is not allowed, but planting under existing trees is permitted.

Coffee

Goal: Plant coffee in a way that protects forest cover.

1. Do not clear trees thicker than 10cm DBH to plant coffee.
2. Native shade trees must be planted every 6 metres in a triangular pattern.
3. A 5-metre-wide fruit tree strip must be planted or maintained around the coffee plantation.

Wages to support community members with on-going activities post-project funding, such as maintenance (cutting vine overgrowth) required for growing trees or the purchase of timber, is expected to be provided through reinvesting a portion of carbon revenue back into project management.
